# Supplementary material for: A3Ti5NbO14 (A = H, Li and K) family: ionic exchange, physical and electrochemical properties
Source: Royal Society of Chemistry journal article supplement (doi:10.1039/d4dt00208c), 2024-01-01
Supplement: d4dt00208c1.pdf [file d4dt00208c1.pdf]

## SUPPORTING INFORMATION

### **$A_3Ti_5NbO_{14}$ (A = H, Li and K) family: Ionic exchange, physical and electrochemical properties**

Audric Neveu,<sup>a,b</sup> Justine Jean,<sup>a,b</sup> Philippe Boullay,<sup>a</sup> Vadim M. Kovrugin,<sup>a,b</sup>  
Armance Sagot,<sup>a,b</sup> Hari Raj,<sup>a,b</sup> and Valerie Pralong <sup>\*a,b</sup>

<sup>a</sup> Normandie Univ, ENSICAEN, Unicaen, CNRS, CRISMAT, 14000 Caen, France.

<sup>b</sup> Réseau sur le Stockage Electrochimique de l'Énergie (RS2E), 80000 Amiens, France.

Email: [valerie.pralong@cnrs.fr](mailto:valerie.pralong@cnrs.fr)

**Table S1. Crystallographic details of PEDT data reduction and dynamical refinement.**

|                                                                                         |                                             |
|-----------------------------------------------------------------------------------------|---------------------------------------------|
| Chemical formula                                                                        | $\text{Li}_3\text{Ti}_5\text{NbO}_{14}$     |
| Temperature (K)                                                                         | 293                                         |
| Crystal system, space group                                                             | monoclinic, $P2_1/m$ (SG #11)               |
| $a, b, c$ (Å) and $\beta$ (°)                                                           | 9.273(15), 3.788(6), 8.871(3) and 114.33(1) |
| $V$ (Å <sup>3</sup> )                                                                   | 283.9                                       |
| Electron wavelength $\lambda$ (Å)                                                       | 0.0251                                      |
| Number of frames                                                                        | 112                                         |
| Tilt step (°)                                                                           | 1.0                                         |
| Precession angle (°)                                                                    | 1.2                                         |
| $\sin(\vartheta_{\max})/\lambda$ (Å <sup>-1</sup> )                                     | 0.70                                        |
| Completeness (%)                                                                        | 81                                          |
| No. of measured, observed [ $I > 3\sigma(I)$ ]<br>reflections                           | 2876, 2816                                  |
| No. of refined parameters, restraints                                                   | 169, 0                                      |
| $g_{\max}$ (Å <sup>-1</sup> ), $S_{g,\max}$ (Å <sup>-1</sup> ), $R_{\text{sg}}$ , steps | 1.6, 0.01, 0.4, 128                         |
| $R(\text{obs})$ , $R(\text{all})$ , $wR(\text{all})$ , GoF(all)                         | 0.177, 0.406, 0.179, 0.408                  |

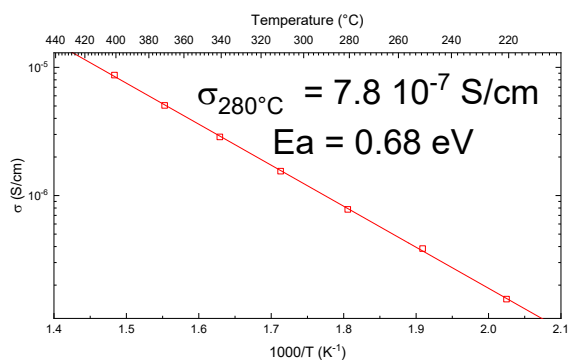**Figure S1. Plot of conductivity as a function of temperature for  $\text{K}_3\text{Ti}_5\text{NbO}_{14}$ .**

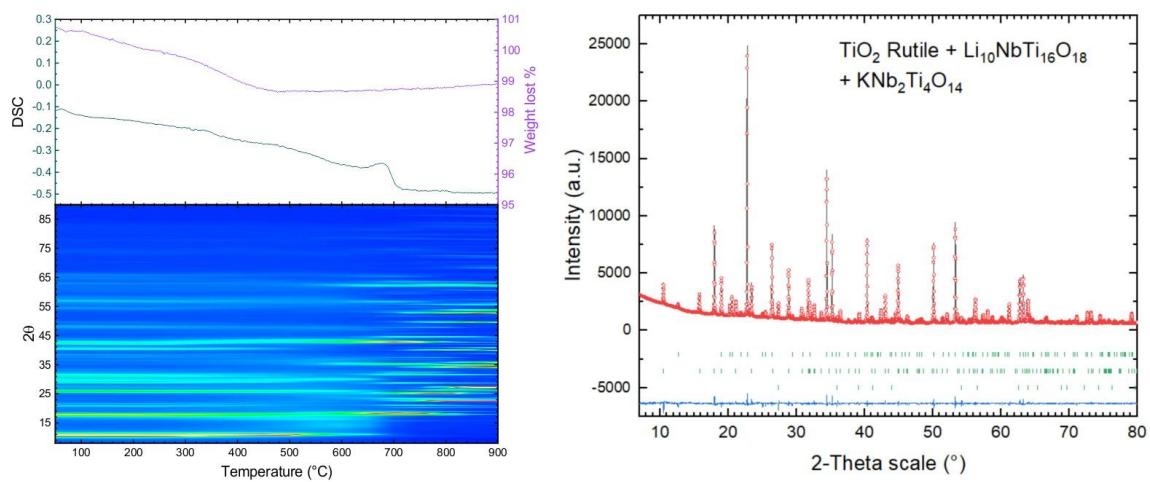

**Figure S2. (a) Graphic reporting ATG signal, DSC signal and XRD pattern of the material  $\text{Li}_3\text{Ti}_5\text{NbO}_{14}$  in function of the temperature, (b) pattern matching of the compositions obtained after annealing at 900°C.**
